# Supplementary material for: Surface strategies for catalytic CO2reduction: from two-dimensional materials to nanoclusters to single atoms
Source: Royal Society of Chemistry journal article supplement (doi:10.1039/c9cs00163h), 2019-01-01
Supplement: c9cs00163h1.pdf [file c9cs00163h1.pdf]

**Table S1:** Relationship between surface strategies and photocatalytic CO<sub>2</sub> reduction properties in 2D materials (Green rectangles represent applicable strategies)

| <i>CO<sub>2</sub> reduction</i><br><i>Surface Strategies</i> | <i>CO<sub>2</sub> adsorption</i> | <i>Light utilization</i> | <i>Carriers separation</i> | <i>Carriers Transfer</i> | <i>CO<sub>2</sub> Activation</i> | <i>Selectivity</i> | <i>Products desorption</i> |
|--------------------------------------------------------------|----------------------------------|--------------------------|----------------------------|--------------------------|----------------------------------|--------------------|----------------------------|
| <i>Defect Engineering</i>                                    | Green                            | Green                    | Green                      | Green                    | Green                            |                    |                            |
| <i>Heteroatom Engineering</i>                                |                                  | Green                    | Green                      |                          |                                  | Green              |                            |
| <i>Composite</i>                                             | Green                            |                          | Green                      |                          | Green                            | Green              |                            |
| <i>Surface molecular functionalization</i>                   | Green                            |                          |                            |                          |                                  |                    |                            |

**Table S2:** Relationship between surface strategies and electrocatalytic CO<sub>2</sub> reduction properties in 2D materials (Green rectangles represent applicable strategies)

| <i>CO<sub>2</sub> reduction</i><br><i>Surface Strategies</i> | <i>CO<sub>2</sub> adsorption</i> | <i>Conductivity</i> | <i>Activation barrier</i> | <i>Intermediate Stabilization</i> | <i>Selectivity</i> | <i>Products desorption</i> |
|--------------------------------------------------------------|----------------------------------|---------------------|---------------------------|-----------------------------------|--------------------|----------------------------|
| <i>Defect Engineering</i>                                    | Green                            | Green               | Green                     | Green                             | Green              |                            |
| <i>Heteroatom Engineering</i>                                |                                  |                     |                           |                                   | Green              |                            |
| <i>Composite</i>                                             |                                  | Green               | Green                     | Green                             | Green              |                            |
| <i>Surface molecular functionalization</i>                   | Green                            |                     |                           |                                   |                    | Green                      |
| <i>Surface alloy</i>                                         |                                  |                     |                           | Green                             |                    | Green                      |
